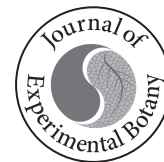

REVIEW PAPER

# We be jammin': an update on pectin biosynthesis, trafficking and dynamics

Charles T. Anderson<sup>1,2</sup>

<sup>1</sup> Department of Biology, The Pennsylvania State University, University Park, PA 16802, USA

<sup>2</sup> Center for Lignocellulose Structure and Formation, The Pennsylvania State University, University Park, PA 16802, USA

To whom correspondence should be addressed. E-mail: [cta3@psu.edu](mailto:cta3@psu.edu)

Received 11 August 2015; Revised 12 October 2015; Accepted 23 October 2015

Editor: Simon Turner, University of Manchester

## Abstract

**Pectins are complex polysaccharides that contain acidic sugars and are major determinants of the cohesion, adhesion, extensibility, porosity and electrostatic potential of plant cell walls. Recent evidence has solidified their positions as key regulators of cellular growth and tissue morphogenesis, although important details of how they achieve this regulation are still missing. Pectins are also hypothesized to function as ligands for wall integrity sensors that enable plant cells to respond to intrinsic defects in wall biomechanics and to wall degradation by attacking pathogens. This update highlights recent advances in our understanding of the biosynthesis of pectins, how they are delivered to the cell surface and become incorporated into the cell wall matrix and how pectins are modified over time in the apoplast. It also poses unanswered questions for further research into this enigmatic but essential class of carbohydrate polymers.**

**Key words:** Cell expansion, cell wall biosynthesis, glycosyltransferase complexes, pectate lyase, pectin methylesterase, polygalacturonase, vesicle trafficking.

## Introduction

The walls of plant cells must be both flexible and strong to enable and constrain cellular, tissue and organ growth. These specialized extracellular matrices, which are largely built of carbohydrate polymers that are synthesized using sugars derived from photosynthesis, serve as dynamic support structures for plants to enable the development of a wide array of morphologies (Cosgrove, 2005). Cell walls also serve as protective barriers that buffer the interiors of plant cells against abiotic and biotic stresses. The so-called primary walls that surround actively growing plant cells are composed of cellulose, hemicelluloses, pectins and structural glycoproteins, and also

contain a wide array of enzymes and other proteins that can modify wall structure or trigger cellular responses to intrinsic and environmental stimuli (Somerville *et al.*, 2004; Keegstra, 2010). The cell wall is often described as a distinct extracellular compartment, but in fact it is intimately connected to the cell surface by components of the wall biosynthetic machinery itself, as well as structural proteins that maintain plasma membrane-wall contacts and sensory proteins that can bind to wall components to monitor wall integrity (Liu *et al.*, 2015).

Pectins have long been used by human societies as gelling agents in foods, and more recently, their influence on wall

Abbreviations: APAP1, ARABINOXYLAN PECTIN ARABINOGALACTAN PROTEIN1;ARAD, ARABINAN DEFICIENT;CESA, CELLULOSE SYNTHASE; FRA1, FRAGILE FIBER 1 kinesin;GalA, galacturonic acid;GAUT, GALACTURONOSYLTRANSFERASE;GT, glycosyltransferase;HG, homogalacturonan;PG, polygalacturonase;PL, pectate lyase;PME, pectin methylesterase;RG-I, rhamnogalacturonan-I;RG-II, rhamnogalacturonan-II;RGXT, RHAMNOGALACTURONAN XYLOSYLTRANSFERASE;RLP, RECEPTOR-LIKE PROTEIN;SCAMP, SECRETORY CARRIER MEMBRANE PROTEIN;ssNMR, solid-state Nuclear Magnetic Resonance;SVC, secretory vesicle compartment;TBL, TRICHOME BIREFRINGENCE-LIKE;WAK, WALL-ASSOCIATED KINASE.

© The Author 2015. Published by Oxford University Press on behalf of the Society for Experimental Biology. All rights reserved.  
For permissions, please email: [journals.permissions@oup.com](mailto:journals.permissions@oup.com)

charge and porosity has made them targets for studies aimed at optimizing cell wall deconstruction, which is one of the most expensive stages in bioenergy production from plant-based biomass (Xiao and Anderson, 2013). Additionally, pectins are often used as biodegradable carriers for time-released drug delivery, and limited studies have indicated that pectins themselves can influence the gut microbiome (Koropatkin *et al.*, 2012) and, in modified forms, act as antitumor agents in some types of cancers (Leclere *et al.*, 2013). Thus, the utility of pectins is widespread, and is poised to expand rapidly as biorefineries become more sophisticated in producing a wide array of biomass-derived, value-added products (Edwards and Doran-Peterson, 2012).

The unique biomechanical properties of plant cell walls, which exhibit both elastic and plastic deformation under stress (Burgert and Dunlop, 2011), have long fascinated biologists. Although cellulose-hemicellulose networks are thought to act as the main load-bearing components of plant cell walls and cellulose-hemicellulose interfaces are the targets of a major class of wall-loosening proteins called expansins (Wang *et al.*, 2013), pectins also play critical functions in wall architecture, cellular growth and tissue morphogenesis (Palin and Geitmann, 2012; Wolf and Greiner, 2012). However, many details of how pectins are generated, delivered to the wall and interact with other wall components to achieve their functions either remain completely mysterious or are only beginning to be understood. This update will focus on synthesizing connections between specific aspects of pectin dynamics, some of which have been covered in further detail in a series of excellent recent reviews (Palin and Geitmann, 2012; Wolf and Greiner, 2012; Atmodjo *et al.*, 2013; Senechal *et al.*, 2014b; Levesque-Tremblay *et al.*, 2015), and will also pose some key questions for future research.

## Evolving views of pectin abundance and structure

Pectins are highly abundant in the primary walls of eudicot plant species and can comprise up to one third of the non-water mass of the wall (Somerville *et al.*, 2004). However, their much lower abundance in secondary walls, which are deposited after plant cells cease growth, and the walls of commelinid monocots, which include bioenergy crops and other grasses (Vogel, 2008), has led to speculation that the functions of pectins can be supplanted by other wall matrix polymers such as glucuronoarabinoxylans, which despite their classification as hemicelluloses also contain large numbers of glucuronic acid residues (Rennie and Scheller, 2014) that make them somewhat pectin-like. However, many monocot genomes contain significant numbers of putative pectin-synthesizing and -modifying genes (Tyler *et al.*, 2010; McCarthy *et al.*, 2014; Senechal *et al.*, 2014b), implying that pectins function in at least some aspects of monocot growth and development. For example, pectins are among the earliest detectable wall elements of the cell plate during cytokinesis in plants and their presence in the cell plates of both dicots (Samuels *et al.*, 1995) and monocots (Baluska *et al.*, 2005)

suggests that a function for pectins in cytokinesis might be conserved among both groups. Additionally, pectin composition and abundance changes in some monocot species in response to environmental stimuli such as drought (Leucci *et al.*, 2008), suggesting that pectins might be involved in facultative adaptations to environmental perturbation across diverse plant taxa. Thus, the perception that pectins are limited to functioning in eudicot primary walls is likely incorrect.

Conventionally, pectins have been classified into so-called 'domains' that include homogalacturonan (HG), xylogalacturonan, apiogalacturonan, rhamnogalacturonan-I (RG-I) and rhamnogalacturonan-II (RG-II) (Atmodjo *et al.*, 2013; Mohnen, 2008). HG is the most abundant form of pectin in the primary walls of eudicot plants, comprising 50–70% of recoverable pectins in *Arabidopsis thaliana* primary walls (Zablackis *et al.*, 1995). It is composed of unbranched  $\alpha$ -1,4-linked galacturonic acid (GalA) chains that can be decorated with xylose to form xylogalacturonan, apiose to form apiogalacturonan, and acetyl groups at the O2 and O3 positions of GalA (Ishii, 1997). The carboxyl groups of GalA residues in HG can be methyl-esterified, and when de-methyl-esterified can be negatively charged, with apparent pKa values ranging from 3.55 to 4.10 depending on the overall degree of methyl-esterification of the polymer (Plaschina *et al.*, 1978); thus, methyl-esterification status can considerably alter the charge, chemistry and rheology of HG (Levesque-Tremblay *et al.*, 2015). RG-I is the second-most abundant form of pectin and possesses a backbone of alternating rhamnose and GalA subunits that are decorated with galactan, arabinan and arabinogalactan side chains. The most structurally complex pectin domain is RG-II, which has an HG-like GalA-containing backbone that is modified with four different side chains; these side chains include 12 different monosaccharide constituents, and side chain A contains apiose residues that can form borate diester linkages to crosslink RG-II molecules, generating RG-II dimers (Funakawa and Miwa, 2015).

These classifications are based on monosaccharide composition and linkage analyses of pectins that have been solubilized from cell wall preparations and purified to varying degrees, but they do not provide a complete picture of pectin structure. The extents to which different pectin domains themselves are linked have not been fully established (Vincken *et al.*, 2003), and although degree of polymerization can be measured in some cases and has been estimated to be fairly homogeneous (Yapo *et al.*, 2007), the precise size distribution for most pectins remains poorly defined. In addition, some pectins are more difficult to extract from the insoluble portions of cell wall preparations (Immerzeel *et al.*, 2006), and their chemical compositions and linkage structures are therefore less certain. Whether these insoluble pectins are molecules that are topologically entangled with other wall polymers such as cellulose or hemicelluloses, are covalently linked to these other polymers (Thompson and Fry, 2000; Popper and Fry, 2005), are themselves highly insoluble, or comprise some combination of these populations, remains unclear. One intriguing possibility is that pectin domains might be linked to polypeptides that serve as nuclei for their biosynthesis. Crosslinks between RG-I and extensins, which are hydroxyproline-rich

glycoproteins that localize to cell walls, have been reported (Qi *et al.*, 1995), and in 2013, Tan and coworkers reported a peptidoglycan structure in which HG, RG-I, galactan and xylan domains were linked to ARABINOXYLAN PECTIN ARABINOGALACTAN PROTEIN1 (APAPI) (Tan *et al.*, 2013). Mutants lacking the APAPI protein displayed alterations in wall composition and extractability, and the authors estimated that up to 95% of extractable RG-I from suspension-cultured cell walls is linked to an arabinogalactan protein (Tan *et al.*, 2013). Whether all pectin domains are attached to polypeptides remains to be fully established. It is possible that APAPI-like peptidoglycans represent a differentially soluble sub-population of pectins, or that these are core ‘remnants’ of pectin biosynthetic products from which pectin macromolecules are cleaved after synthesis. It will be interesting to learn to what extent APAPI-like proteins are involved in pectin biosynthesis, whether their glycans are common or distinct from those of other types of pectins and exactly how attachment to a polypeptide affects pectin behavior in the wall.

### Pectin biosynthesis: a complex subject

Given the structural complexity of pectins, over 65 distinct enzyme activities have been hypothesized to be required for their synthesis (Mohnen, 2008; Caffall and Mohnen, 2009; Harholt *et al.*, 2010). However, genetic and biochemical experiments are making progress toward identifying the genes and enzymes that generate pectin linkages. The site of pectin synthesis is thought to be the Golgi lumen (Sterling *et al.*, 2001), wherein nucleotide-sugar substrates, S-adenyl-L-methionine and acetyl-CoA or some other acetylated carrier molecule (Schultink *et al.*, 2015) are imported from the cytoplasm and used by a variety of glycosyltransferases (GTs), methyltransferases and acetyltransferases to construct pectin macromolecules. One of the best-characterized pectin biosynthetic enzymes is GALACTURONOSYLTRANSFERASE1 (GAUT1), which catalyzes the transfer of GalA from UDP-GalA to an oligo-GalA acceptor (Sterling *et al.*, 2006). GAUT1 is cleaved at its N-terminus during maturation and thus lacks a membrane anchor itself, but it has been reported to be anchored to the Golgi membrane in a complex with GAUT7; GAUT7 does not possess detectable GalA transferase activity, but retains an N-terminal membrane anchor (Atmodjo *et al.*, 2011). HG can also be xylosylated to form xylogalacturonan by the membrane-associated protein XYLOGALACTURONAN DEFICIENT1 (Jensen *et al.*, 2008). For RG-I, genetic evidence indicates that ARABINAN DEFICIENT1 and ARABINAN DEFICIENT 2 function non-redundantly to synthesize arabinan side chains, and these proteins can form both homo- and heterodimers when expressed transiently (Harholt *et al.*, 2012; Lund *et al.*, 2015). Likewise GALACTAN SYNTHASE1 has been confirmed biochemically as a  $\beta$ -1,4-galactan galactosyltransferase (Liwanag *et al.*, 2012). In the case of RG-II, three RHAMNOGALACTURONAN XYLOSYLTRANSFERASE (RGXT) proteins have been proposed to transfer xylose residues to RG-II (Egelund

*et al.*, 2006, 2008.), and two sialyltransferase-like proteins are hypothesized to add 2-keto-3-deoxy-D-lyxo-heptulosaric acid (Dha) and/or 2-keto-3-deoxy-D-manno-octulosonic acid (Kdo) to its side chains (Dumont *et al.*, 2014).

The acetylation of pectin is putatively carried out by pectin acetyltransferases, possibly in the TRICHOME BIREFRINGENCE-LIKE (TBL) protein family (Schultink *et al.*, 2015). However, no specific protein has thus far been demonstrated as a bona fide acetyltransferase for pectin. Methyl-esterification of GalA residues in HG is thought to be achieved by the putative methyltransferases QUASIMODO2 (QUA2), QUASIMODO3 (QUA3), COTTON GOLGI-RELATED2 (CGR2) and/or COTTON GOLGI-RELATED3 (CGR3) (Mouille *et al.*, 2007; Held *et al.*, 2011; Miao *et al.*, 2011; Kim *et al.*, 2015), resulting in HG chains that have a high degree of methyl-esterification (DM) soon after synthesis. In *A. thaliana*, *qua2* mutants display lower HG methyl-esterification, are dwarfed and have less HG in their cell walls (Mouille *et al.*, 2007). Whether the reduction in HG is a compensatory response to lowered methyltransferase activity or is due to increased pectin degradation is not entirely clear, although the degree of polymerization for HG is not substantially altered in the mutant (Ralet *et al.*, 2008), suggesting that a compensatory decrease in HG synthesis occurs. Likewise, *cgr2 cgr3* double mutant plants are dwarfed, have HG with a lower degree of methyl-esterification, and display less HG methyltransferase activity in microsomes (Kim *et al.*, 2015). The precise contribution of each of these enzymes to HG methyl-esterification remains to be determined.

The coordination of so many enzyme activities during pectin biosynthesis might be achieved, at least in part, by the formation of multi-subunit protein complexes that can ‘pass’ acceptor substrates to one another. The presence of several types of such complexes might result in a ‘domain synthesis’ mechanism for pectin biosynthesis, in which individual domains are built and then linked together to form final pectin macromolecules (Atmodjo *et al.*, 2013). The fact that QUA3 and a related protein have been detected as interactors of the GAUT1:GAUT7 complex (Atmodjo *et al.*, 2011) suggests that HG methyl-esterification might occur coordinately with its polymerization, and the interaction of ARAD1 with both itself and ARAD2 implies that these proteins might work together to construct arabinan side chains. However, ‘oligoglycosyltransferases’ that can link multimeric pectin chains together have not yet been reported. Further analyses of interactions between pectin biosynthetic enzymes, facilitated by newly developed protein-protein interaction reporters that reversibly reconstitute fluorescent or luminescent proteins (Gookin and Assmann, 2014; Lund *et al.*, 2015) and are thus less prone to false positive results than previous generations of reporters, should shed more light on the extent to which pectin biosynthesis involves orchestration between physically linked enzymes.

### Transport and delivery of pectins to the apoplast

Although pectins are synthesized in the Golgi, there is considerable uncertainty about how they are then trafficked from

the Golgi to the plasma membrane. Pioneering immunoelectron microscopy experiments using antibodies raised against isolated cell wall components have indicated that in some cell types, pectins might exit from the cis/medial Golgi in vesicles that are delivered directly to the plasma membrane, but in other cell types, both pectins and hemicelluloses are detectable in later Golgi compartments (Moore *et al.*, 1991; Lynch and Staehelin, 1992; Zhang and Staehelin, 1992). However, these data are not conclusive, in that biophysical or chemical changes in pectins in later Golgi compartments might prevent recognition by antibodies in the former cell types. Uncertainty also stems in part from the complexity of post-Golgi trafficking, in which cargo transits from the Golgi to the trans-Golgi network (TGN) before being targeted along exocytic or post-endocytic pathways. The post-Golgi trafficking mediators ECHIDNA, YPT/RAB GTPase Interacting Protein 4a, and YPT/RAB GTPase Interacting Protein 4b are likely to function in the proper targeting of pectins to the plasma membrane, since mutants lacking these genes mislocalize wall matrix polymers to the vacuole (Gendre *et al.*, 2011, 2013; McFarlane *et al.*, 2013). Mobile Secretory Vesicle Compartments (SVCs) marked by the late trafficking protein SECRETORY CARRIER MEMBRANE PROTEIN 2 (SCAMP2) have been demonstrated to contain pectins (Toyooka *et al.*, 2009) and have therefore been proposed to perform bulk delivery of pectins to the cell surface, and members of the exocyst complex, which mediates secretion at the plasma membrane in plant cells (Hala *et al.*, 2008), have been implicated in the final delivery of pectins to the apoplast, albeit in highly specialized seed coat cells that produce large amounts of pectin-rich mucilage (Kulich *et al.*, 2010).

One predicted consequence of pectin transit through the secretory apparatus is a decrease in the pH of the environment from ~6.6 in the Golgi to a more acidic pH that ranges ~5 in growing cell walls (Felle, 2001; Martiniere *et al.*, 2013). This change in pH might be expected to alter the physical properties of pectins, possibly resulting in changes in their solubility and/or interactions with other wall matrix polymers, which are synthesized in the same Golgi compartments. These changing physical properties, in turn, might also influence the size, shape and dynamics of vesicular compartments along the secretory pathway: for example, seed coat and root cap cells, both of which secrete large amounts of pectins, have Golgi that appear distinct from those of other cell types (Staehelin *et al.*, 1990; Young *et al.*, 2008). The development of techniques for measuring local pH and the precise synthesis status and nanomechanical properties of pectins in different secretory compartments will be required to test these ideas.

The timing of when HG is methyl-esterified relative to its initial synthesis (see above) is also relevant to its stability. Pectin methyl-esterases (PMEs), which remove methyl-ester groups from HG, releasing methanol and a proton, polygalacturonases (PGs), which hydrolyze HG backbones and pectate lyases (PLs), which cleave HG backbones via a  $\beta$ -elimination mechanism, would be expected to co-exist with nascent pectin molecules in Golgi and post-Golgi compartments before their secretion to the apoplast. Inhibitory and autoinhibitory proteins and domains exist that might prevent PMEs, PGs

and PLs from acting prematurely on their substrates, and some of these can be removed by subtilisin-like proteases in the wall (Rautengarten *et al.*, 2008; Senechal *et al.*, 2014a). Additionally, the aforementioned pH gradient along the secretory pathway might prevent PMEs, PGs and PLs from operating until they reach the relatively acidic environment of the apoplast; indeed, the activity of many PMEs, PGs and PLs is highly pH-dependent (Senechal *et al.*, 2014b). Whether these or other regulatory mechanisms are responsible for stabilizing pectins before their delivery to the apoplast, or if in fact pectin degradation begins during transit, remains to be determined.

The question of how the spatial distribution of pectin delivery sites at the cell surface is regulated has not yet been answered, although tantalizing hints have emerged. In tip-growing pollen tubes, pectin subtypes are distributed heterogeneously along the length of the cell (Rounds *et al.*, 2011; Chebli *et al.*, 2012), which may be a consequence of oscillations in wall component delivery and/or growth (Li *et al.*, 1994; McKenna *et al.*, 2009) and/or variations in the timing and/or location of PME activity that result in differential epitope localization. Golgi bodies move through the cytoplasm in diffusely growing cells via actin-myosin-driven cytoplasmic streaming, and this mobility would be expected to spread the delivery of pectins to the apoplast relatively evenly across the cell surface, but recent data have also implicated the microtubule cytoskeleton in pectin transport and delivery. Genetic and metabolic labeling experiments using click chemistry-based detection of a taggable sugar analog, fucose-alkyne, have shown that pectins are delivered to discrete sites in root epidermal cells (Anderson *et al.*, 2012) and that mutations in the FRAGILE FIBER 1 kinesin result in reduced delivery of fucose-alkyne-labeled pectins to the cell wall (Zhu *et al.*, 2015). The relatively normal distribution and density of CELLULOSE SYNTHASE3 (CESA3) in *fral* mutants suggests that CESAs and pectins might be delivered to the cell wall in distinct compartments, providing differential control over the sites and densities of matrix polymer delivery and cellulose extrusion into the wall, although further experiments will be required to fully support this hypothesis.

## Pectin dynamics in the wall

The cell walls of plants first form during cytokinesis, when the secretory apparatus of the cell is reorganized to direct the delivery and/or synthesis of wall polymers to the growing cell plate, which coalesces from post-Golgi compartments at the midline of the phragmoplast and requires massive membrane rearrangements for its formation, expansion and remodeling into a nascent cell wall (Jurgens, 2005). Pectins are detectable early in the formation of the cell plate (Samuels *et al.*, 1995) and their flexibility might facilitate cell plate deformation and expansion. It is also possible that pectins, through interactions with extensins and/or other structural proteins (Cannon *et al.*, 2008), might provide the proper chemical or mechanical environment for the initiation of cellulose biosynthesis in newly forming cell walls (Miart *et al.*, 2014), perhaps by forming nanoscale patches of wall with differential stiffness that cause nascent cellulose chains to coalesce into microfibrils.

Indeed, pectins have recently been reported to bind extensively to bacterial cellulose during its synthesis, although they do not appear to dramatically affect cellulose crystallinity (Lin *et al.*, 2015, 2016). Pectins have also been detected in close proximity to cellulose in intact plant cell walls using solid-state Nuclear Magnetic Resonance (ssNMR) experiments (Dick-Perez *et al.*, 2012; Wang *et al.*, 2015), suggesting intimate interactions with the cellulose-hemicellulose network. Upon the completion of cytokinesis, the new wall fuses with the parental wall and distinct wall layers become apparent as wall deposition continues in both daughter cells. The layer that lies between the primary walls of each cell is the so-called middle lamella, which is highly enriched in pectins and is hypothesized to function in cell-cell adhesion, a topic that has recently been reviewed (Daher and Braybrook, 2015) and will not be discussed in detail here.

Recently, pectin de-methyl-esterification in the wall has been proposed as a key event in the symmetry breaking that initiates anisotropic cellular expansion during the elongation of epidermal cells in *Arabidopsis* hypocotyls (Peaucelle *et al.*, 2015), a process that heretofore has largely been attributed to constraints placed on radial expansion by the strength of transversely oriented cellulose microfibrils. As the wall expands during cell growth, the middle lamella might be expected to thin to the point of disappearance, but this does not appear to be the case. Are additional pectins ‘squeezed’ into the middle lamella as the cell grows? Intriguing observations in the unicellular algae *Penium margaritaceum* suggest that this might occur, since in these cells, pectins are enriched in a reticulated outer wall layer that is distal to an underlying cellulosic layer, suggesting that as cell growth and wall deformation occurs, pectins are extruded from the primary wall (Domozych *et al.*, 2014). In the case of continuous pectin delivery in growing plant tissues, an equilibrium might exist in which the steady state fraction of pectin in the wall is constant, but as wall biosynthesis diminishes and growth continues, as has been shown to be possible in the case of cellulose for elongating hypocotyls (Refregier *et al.*, 2004), the amount of pectin in the primary wall might decrease and/or become reorganized (Anderson *et al.*, 2012). This successive physical de-pectination might have important implications for wall biomechanics and cellular adhesion.

The ultimate fate of much HG that is delivered to the wall appears to be de-methyl-esterification by PME, potentially followed by degradation. Depending on the cell type and the specific enzyme, HG degradation by PGs can facilitate either cellular expansion (Xiao *et al.*, 2014) or controlled cell separation events that occur during plant development and maturation (Ogawa *et al.*, 2009). Whether this degradation is regulated by transcriptional networks that turn different pectin-modifying genes on and off in diverse spatiotemporal patterns (Kim *et al.*, 2006), by post-translational control of enzyme activities (Senechal *et al.*, 2014b), or by both of these factors in combination has yet to be fully determined.

## Pectins and wall integrity signaling

As degradable wall components, pectins are ideally situated to act as molecular sentinels in the apoplast for the detection

of wall damage or degradation, either as a result of intrinsic growth processes or by invading pathogens, and have therefore been proposed to act as key players in wall integrity signaling networks (Engelsdorf and Hamann, 2014). Pectins have been identified as binding interactors with cell wall integrity-sensing WALL-ASSOCIATED KINASES (WAKs) (Wagner and Kohorn, 2001; Decreux and Messiaen, 2005), inducing MAP kinase signaling cascades that result in changes in gene expression (Kohorn *et al.*, 2009). Although pectin-derived oligogalacturonides have been proposed to act as ligands for WAKs (Brutus *et al.*, 2010), the exact nature of the pectic epitope(s) that bind to WAKs have not been precisely defined, and the question of whether pectins act in concert with other molecules, such as secreted peptides, to activate WAKs and/or other receptor-like kinases has not been fully addressed. Another open question is exactly how bound pectin molecules transmit ‘integrity’ signals: are these signals based on size-dependent interactions between pectin fragments and receptor binding pockets, mechanical tension (or lack thereof) between the receptor and ligand, which is in turn connected to one or more supermolecular wall networks, or some combination thereof? Genetic evidence has also recently implicated RECEPTOR-LIKE PROTEIN 44 (RLP44) in sensing changes in the status of pectins in the cell wall and transmitting this information through the brassinosteroid hormone signaling network (Wolf *et al.*, 2014). However, the ligand for RLP44 has not yet been isolated. Reductive dissection of the wall integrity sensing machinery by testing combinations of heterologously expressed receptors and purified or synthesized candidate ligands might be required to fully understand how pectins, alone or in combination with other wall components, activate wall integrity signaling.

## New methods for detecting pectin structure and dynamics

Given their complex structures, pectins have resisted complete characterization. A large number of antibodies has been generated that can detect specific pectin epitopes in intact plant tissues or wall extracts (Pattathil *et al.*, 2010); despite their broad utility, these probes should be used with the knowledge that the epitopes for many of these antibodies have not been fully defined (due to the difficulty of purifying or synthesizing the appropriate oligo- or polysaccharides for binding studies). Additionally, certain pectin epitopes might be masked in intact walls by other wall polymers (Marcus *et al.*, 2008, 2010), and antibodies are large in comparison with the average pore sizes of cell walls, raising questions about penetration and accessibility.

Fortunately, progress is being made in the development of sensitive and comprehensive methods for detecting pectin structure and degradation. So-called ‘epitope detection chromatography’ can be used to separate subpopulations of pectins and probe their structures using the above-mentioned antibodies (Cornuault *et al.*, 2014). Alternatively, after printing specialized glycan arrays containing a wide variety of pectin epitopes and probing them with sets of monoclonal

antibodies, multivariate regression analysis can be used to identify trends in antibody-epitope binding patterns (Sousa *et al.*, 2015). However, the complexity and apparent heterogeneity of pectins makes these methods imperfect for determining complete structural information. PME activity and pectin degradation can be detected using the cationic dye Ruthenium Red on agar plate-based assays in combination with chromatographic separation of pectin fragments (Lionetti, 2015), and the oligogalacturonides produced by pectin-degrading enzymes in intact plants can be measured using MALDI-TOF mass spectrometry (Korner *et al.*, 1998; Pontiggia *et al.*, 2015). Ideally, the community will be able to develop the ability to ‘sequence’ pectin structures to more completely understand structure-function relationships.

Another promising avenue for detecting pectins involves the development and application of small molecule-based probes. One promising study along these lines involves chitosan oligosaccharides, which molecularly ‘dock’ with stretches of de-methyl-esterified HG; when covalently linked to a fluorophore, these probe molecules can be used to label de-methyl-esterified HG *in situ* (Mravec *et al.*, 2014). Additionally, as mentioned earlier, the time-resolved behavior of populations of synchronously synthesized pectins can be followed using metabolic labeling and click chemistry (Anderson *et al.*, 2012), although this approach does not currently allow for *in vivo* fluorescent labeling and requires the use of pulse-chase experiments to follow pectin dynamics.

In summary, our understanding of pectin synthesis, trafficking and behavior is far from complete, but the future looks bright. As functional genomics and advances in biochemistry and cell biology allow us to identify the full contingent of pectin biosynthetic and modifying genes and the life histories of their products, we will become better able to manipulate pectin structure and study its effects on wall organization and behavior, plant development and the production of renewable food, materials and energy resources.

## Acknowledgements

Thanks to members of the Anderson Laboratory, members of the Center for Lignocellulose Structure and Formation, Dr Deborah Mohnen, Dr Wolf Frommer, Dr Jocelyn Rose, and Dr Chris Somerville for stimulating discussions. Work on this review by CTA was supported as part of The Center for Lignocellulose Structure and Formation, an Energy Frontier Research Center funded by the US Department of Energy, Office of Science, Basic Energy Sciences under Award # DE-SC0001090.

## References

Anderson CT, Wallace IS, Somerville CR. 2012. Metabolic click-labeling with a fucose analog reveals pectin delivery, architecture, and dynamics in *Arabidopsis* cell walls. *Proceedings of the National Academy of Sciences, USA* **109**, 1329–1334.

Atmodjo MA, Hao Z, Mohnen D. 2013. Evolving views of pectin biosynthesis. *Annual Review of Plant Biology* **64**, 747–779.

Atmodjo MA, Sakuragi Y, Zhu X, Burrell AJ, Mohanty SS, Atwood JA, 3rd, Orlando R, Scheller HV, Mohnen D. 2011. Galacturonosyltransferase (GAUT)1 and GAUT7 are the core of a plant cell wall pectin biosynthetic homogalacturonan:galacturonosyltransferase complex. *Proceedings of the National Academy of Sciences, USA* **108**, 20225–20230.

Baluska F, Liners F, Hlavacka A, Schlicht M, Van Cutsem P, McCurdy DW, Menzel D. 2005. Cell wall pectins and xyloglucans are internalized into dividing root cells and accumulate within cell plates during cytokinesis. *Protoplasma* **225**, 141–155.

Brutus A, Sicilia F, Macone A, Cervone F, De Lorenzo G. 2010. A domain swap approach reveals a role of the plant wall-associated kinase 1 (WAK1) as a receptor of oligogalacturonides. *Proceedings of the National Academy of Sciences, USA* **107**, 9452–9457.

Burgert I, Dunlop JW. 2011. Micromechanics of cell walls. *Signalling and Communication in Plants* **9**.

Caffall KH, Mohnen D. 2009. The structure, function, and biosynthesis of plant cell wall pectic polysaccharides. *Carbohydrate Research* **344**, 1879–1900.

Cannon MC, Terneus K, Hall Q, Tan L, Wang Y, Wegenhart BL, Chen L, Lampion DT, Chen Y, Kieliszewski MJ. 2008. Self-assembly of the plant cell wall requires an extensin scaffold. *Proceedings of the National Academy of Sciences, USA* **105**, 2226–2231.

Chebli Y, Kaneda M, Zerzour R, Geitmann A. 2012. The cell wall of the *Arabidopsis* pollen tube – spatial distribution, recycling, and network formation of polysaccharides. *Plant Physiology* **160**, 1940–1955.

Cornuault V, Manfield IW, Ralet MC, Knox JP. 2014. Epitope detection chromatography: a method to dissect the structural heterogeneity and inter-connections of plant cell-wall matrix glycans. *Plant Journal* **78**, 715–722.

Cosgrove DJ. 2005. Growth of the plant cell wall. *Nature reviews. Molecular Cell Biology* **6**, 850–861.

Daher FB, Braybrook SA. 2015. How to let go: pectin and plant cell adhesion. *Frontiers in Plant Science* **6**, 523.

Decreux A, Messiaen J. 2005. Wall-associated kinase WAK1 interacts with cell wall pectins in a calcium-induced conformation. *Plant and Cell Physiology* **46**, 268–278.

Dick-Perez M, Wang T, Salazar A, Zabolina OA, Hong M. 2012. Multidimensional solid-state NMR studies of the structure and dynamics of pectic polysaccharides in uniformly <sup>13</sup>C-labeled *Arabidopsis* primary cell walls. *Magnetic resonance in chemistry: MRC* **50**, 539–550.

Domozych DS, Sorensen I, Popper ZA, *et al.* 2014. Pectin metabolism and assembly in the cell wall of the charophyte green alga *Penium margaritaceum*. *Plant Physiology* **165**, 105–118.

Dumont M, Lehner A, Bouton S, Kiefer-Meyer MC, Voxeur A, Pelloux J, Lerouge P, Mollet JC. 2014. The cell wall pectic polymer rhamnogalacturonan-II is required for proper pollen tube elongation: implications of a putative sialyltransferase-like protein. *Annals of Botany* **114**, 1177–1188.

Edwards MC, Doran-Peterson J. 2012. Pectin-rich biomass as feedstock for fuel ethanol production. *Applied Microbiology and Biotechnology* **95**, 565–575.

Egelund J, Damager I, Faber K, Olsen CE, Ulvskov P, Petersen BL. 2008. Functional characterisation of a putative rhamnogalacturonan II specific xylosyltransferase. *FEBS Letters* **582**, 3217–3222.

Egelund J, Petersen BL, Motawia MS, Damager I, Faik A, Olsen CE, Ishii T, Clausen H, Ulvskov P, Geshi N. 2006. *Arabidopsis thaliana* RGXT1 and RGXT2 encode Golgi-localized (1,3)-alpha-D-xylosyltransferases involved in the synthesis of pectic rhamnogalacturonan-II. *Plant Cell* **18**, 2593–2607.

Engelsdorf T, Hamann T. 2014. An update on receptor-like kinase involvement in the maintenance of plant cell wall integrity. *Annals of Botany* **114**, 1339–1347.

Felle HH. 2001. pH: signal and messenger in plant cells. *Plant Biology* **3**, 577–591.

Funakawa H, Miwa K. 2015. Synthesis of borate cross-linked rhamnogalacturonan II. *Frontiers in Plant Science* **6**, 223.

Genre D, McFarlane HE, Johnson E, Mouille G, Sjodin A, Oh J, Lesvesque-Tremblay G, Watanabe Y, Samuels L, Bhalerao RP. 2013. Trans-Golgi network localized ECHIDNA/Ypt interacting protein complex is required for the secretion of cell wall polysaccharides in *Arabidopsis*. *Plant Cell* **25**, 2633–2646.

Genre D, Oh J, Boutte Y, *et al.* 2011. Conserved *Arabidopsis* ECHIDNA protein mediates trans-Golgi-network trafficking and cell elongation. *Proceedings of the National Academy of Sciences, USA* **108**, 8048–8053.

- Gookin TE, Assmann SM.** 2014. Significant reduction of BiFC non-specific assembly facilitates in planta assessment of heterotrimeric G-protein interactors. *Plant Journal* **80**, 553–567.
- Hala M, Cole R, Synek L, Drdova E, Pecenkova T, Nordheim A, Lamkemeyer T, Madlung J, Hochholdinger F, Fowler JE, Zarsky V.** 2008. An exocyst complex functions in plant cell growth in *Arabidopsis* and tobacco. *Plant Cell* **20**, 1330–1345.
- Harholt J, Jensen JK, Verhertbruggen Y, et al.** 2012. ARAD proteins associated with pectic Arabinan biosynthesis form complexes when transiently overexpressed in planta. *Planta* **236**, 115–128.
- Harholt J, Suttangkakul A, Vibe Scheller H.** 2010. Biosynthesis of pectin. *Plant Physiology* **153**, 384–395.
- Held MA, Be E, Zemelis S, Withers S, Wilkerson C, Brandizzi F.** 2011. CGR3: a Golgi-localized protein influencing homogalacturonan methylesterification. *Molecular Plant* **4**, 832–844.
- Immerzeel P, Eppink MM, de Vries SC, Schols HA, Voragen AGJ.** 2006. Carrot arabinogalactan proteins are interlinked with pectins. *Physiologia Plantarum* **128**, 18–28.
- Ishii T.** 1997. O-acetylated oligosaccharides from pectins of potato tuber cell walls. *Plant Physiology* **113**, 1265–1272.
- Jensen JK, Sorensen SO, Harholt J, et al.** 2008. Identification of a xylogalacturonan xylosyltransferase involved in pectin biosynthesis in *Arabidopsis*. *Plant Cell* **20**, 1289–1302.
- Jurgens G.** 2005. Plant cytokinesis: fission by fusion. *Trends in Cell Biology* **15**, 277–283.
- Keegstra K.** 2010. Plant cell walls. *Plant Physiology* **154**, 483–486.
- Kim J, Shiu SH, Thoma S, Li WH, Patterson SE.** 2006. Patterns of expansion and expression divergence in the plant polygalacturonase gene family. *Genome Biology* **7**, R87.
- Kim SJ, Held MA, Zemelis S, Wilkerson C, Brandizzi F.** 2015. CGR2 and CGR3 have critical overlapping roles in pectin methylesterification and plant growth in *Arabidopsis thaliana*. *Plant Journal* **82**, 208–220.
- Kohorn BD, Johansen S, Shishido A, Todorova T, Martinez R, Defeo E, Obregon P.** 2009. Pectin activation of MAP kinase and gene expression is WAK2 dependent. *Plant Journal* **60**, 974–982.
- Korner R, Limberg G, Mikkelsen JD, Roepstorff P.** 1998. Characterization of enzymatic pectin digests by matrix-assisted laser desorption/ionization mass spectrometry. *Journal of Mass Spectrometry* **33**, 836–842.
- Koropatkin NM, Cameron EA, Martens EC.** 2012. How glycan metabolism shapes the human gut microbiota. *Nature Reviews. Microbiology* **10**, 323–335.
- Kulich I, Cole R, Drdova E, Cvrckova F, Soukup A, Fowler J, Zarsky V.** 2010. *Arabidopsis* exocyst subunits SEC8 and EXO70A1 and exocyst interactor ROH1 are involved in the localized deposition of seed coat pectin. *New Phytologist* **188**, 615–625.
- Leclere L, Cutsem PV, Michiels C.** 2013. Anti-cancer activities of pH- or heat-modified pectin. *Frontiers in Pharmacology* **4**, 128.
- Leucci MR, Lenucci MS, Piro G, Dalessandro G.** 2008. Water stress and cell wall polysaccharides in the apical root zone of wheat cultivars varying in drought tolerance. *Journal of Plant Physiology* **165**, 1168–1180.
- Levesque-Tremblay G, Pelloux J, Braybrook SA, Muller K.** 2015. Tuning of pectin methylesterification: consequences for cell wall biomechanics and development. *Planta* **242**, 791–811.
- Li YQ, Chen F, Linskens HF, Cresti M.** 1994. Distribution of unesterified and esterified pectins in cell walls of pollentubes of flowering plants. *Sexual Plant Reproduction* **7**, 145–152.
- Lin D, Lopez-Sanchez P, Gidley MJ.** 2015. Binding of arabinan or galactan during cellulose synthesis is extensive and reversible. *Carbohydrate Polymers* **126**, 108–121.
- Lin D, Lopez-Sanchez P, Gidley MJ.** 2016. Interactions of pectins with cellulose during its synthesis in the absence of calcium. *Food Hydrocolloids* **52**, 57–68.
- Lionetti V.** 2015. PECTOPLATE: the simultaneous phenotyping of pectin methylesterases, pectinases, and oligogalacturonides in plants during biotic stresses. *Frontiers in Plant Science* **6**, 331.
- Liu Z, Persson S, Sanchez-Rodriguez C.** 2015. At the border: the plasma membrane-cell wall continuum. *Journal of Experimental Botany* **66**, 1553–1563.
- Liwanag AJ, Ebert B, Verhertbruggen Y, Rennie EA, Rautengarten C, Oikawa A, Andersen MC, Clausen MH, Scheller HV.** 2012. Pectin biosynthesis: GAL51 in *Arabidopsis thaliana* is a beta-1,4-galactan beta-1,4-galactosyltransferase. *Plant Cell* **24**, 5024–5036.
- Lund CH, Bromley JR, Stenbaek A, Rasmussen RE, Scheller HV, Sakuragi Y.** 2015. A reversible Renilla luciferase protein complementation assay for rapid identification of protein-protein interactions reveals the existence of an interaction network involved in xyloglucan biosynthesis in the plant Golgi apparatus. *Journal of Experimental Botany* **66**, 85–97.
- Lynch MA, Staehelin LA.** 1992. Domain-specific and cell type-specific localization of two types of cell wall matrix polysaccharides in the clover root tip. *Journal of Cell Biology* **118**, 467–479.
- Marcus SE, Blake AW, Benians TA, et al.** 2010. Restricted access of proteins to mannan polysaccharides in intact plant cell walls. *Plant Journal* **64**, 191–203.
- Marcus SE, Verhertbruggen Y, Herve C, Ordaz-Ortiz JJ, Farkas V, Pedersen HL, Willats WG, Knox JP.** 2008. Pectic homogalacturonan masks abundant sets of xyloglucan epitopes in plant cell walls. *BMC Plant Biology* **8**, 60.
- Martiniere A, Bassil E, Jublanc E, Alcon C, Reguera M, Sentenac H, Blumwald E, Paris N.** 2013. In vivo intracellular pH measurements in tobacco and *Arabidopsis* reveal an unexpected pH gradient in the endomembrane system. *Plant Cell* **25**, 4028–4043.
- McCarthy TW, Der JP, Honaas LA, dePamphilis CW, Anderson CT.** 2014. Phylogenetic analysis of pectin-related gene families in *Physcomitrella patens* and nine other plant species yields evolutionary insights into cell walls. *BMC Plant Biology* **14**, 79.
- McFarlane HE, Watanabe Y, Gendre D, Carruthers K, Levesque-Tremblay G, Haughn GW, Bhalerao RP, Samuels L.** 2013. Cell wall polysaccharides are mislocalized to the Vacuole in echidna mutants. *Plant and Cell Physiology* **54**, 1867–1880.
- McKenna ST, Kunkel JG, Bosch M, Rounds CM, Vidali L, Winship LJ, Hepler PK.** 2009. Exocytosis precedes and predicts the increase in growth in oscillating pollen tubes. *Plant Cell* **21**, 3026–3040.
- Miao Y, Li HY, Shen J, Wang J, Jiang L.** 2011. QUASIMODO 3 (QUA3) is a putative homogalacturonan methyltransferase regulating cell wall biosynthesis in *Arabidopsis* suspension-cultured cells. *Journal of Experimental Botany* **62**, 5063–5078.
- Miart F, Desprez T, Biot E, Morin H, Belcram K, Hofte H, Gonneau M, Vernhettes S.** 2014. Spatio-temporal analysis of cellulose synthesis during cell plate formation in *Arabidopsis*. *Plant Journal* **77**, 71–84.
- Mohnen D.** 2008. Pectin structure and biosynthesis. *Current Opinion in Plant Biology* **11**, 266–277.
- Moore PJ, Swords KM, Lynch MA, Staehelin LA.** 1991. Spatial organization of the assembly pathways of glycoproteins and complex polysaccharides in the Golgi apparatus of plants. *Journal of Cell Biology* **112**, 589–602.
- Mouille G, Ralet MC, Cavalier C, et al.** 2007. Homogalacturonan synthesis in *Arabidopsis thaliana* requires a Golgi-localized protein with a putative methyltransferase domain. *Plant Journal* **50**, 605–614.
- Mravec J, Kracun SK, Rydahl MG, et al.** 2014. Tracking developmentally regulated post-synthetic processing of homogalacturonan and chitin using reciprocal oligosaccharide probes. *Development* **141**, 4841–4850.
- Ogawa M, Kay P, Wilson S, Swain SM.** 2009. ARABIDOPSIS DEHISCENCE ZONE POLYGALACTURONASE1 (ADPG1), ADPG2, and QUARTET2 are Polygalacturonases required for cell separation during reproductive development in *Arabidopsis*. *Plant Cell* **21**, 216–233.
- Palin R, Geitmann A.** 2012. The role of pectin in plant morphogenesis. *Biosystems* **109**, 397–402.
- Pattathil S, Avci U, Baldwin D, et al.** 2010. A comprehensive toolkit of plant cell wall glycan-directed monoclonal antibodies. *Plant Physiology* **153**, 514–525.
- Peaucelle A, Wightman R, Hofte H.** 2015. The control of growth symmetry breaking in the *Arabidopsis* hypocotyl. *Current Biology* **25**, 1746–1752.
- Plaschina IG, Braudo EE, Tolstoguzov VB.** 1978. Circular-dichroism studies of pectin solutions. *Carbohydrate Research* **60**, 1–8.
- Pontiggia D, Ciarcianelli J, Salvi G, Cervone F, De Lorenzo G, Mattei B.** 2015. Sensitive detection and measurement of oligogalacturonides in *Arabidopsis*. *Frontiers in Plant Science* **6**, 258.

- Popper ZA, Fry SC.** 2005. Widespread occurrence of a covalent linkage between xyloglucan and acidic polysaccharides in suspension-cultured angiosperm cells. *Annals of Botany* **96**, 91–99.
- Qi X, Behrens BX, West PR, Mort AJ.** 1995. Solubilization and partial characterization of extensin fragments from cell walls of cotton suspension cultures. Evidence for a covalent cross-link between extensin and pectin. *Plant Physiology* **108**, 1691–1701.
- Ralet MC, Crepeau MJ, Lefebvre J, Mouille G, Hofte H, Thibault JF.** 2008. Reduced number of homogalacturonan domains in pectins of an *Arabidopsis* mutant enhances the flexibility of the polymer. *Biomacromolecules* **9**, 1454–1460.
- Rautengarten C, Usadel B, Neumetzler L, Hartmann J, Bussis D, Altmann T.** 2008. A subtilisin-like serine protease essential for mucilage release from *Arabidopsis* seed coats. *Plant Journal* **54**, 466–480.
- Refregier G, Pelletier S, Jaillard D, Hofte H.** 2004. Interaction between wall deposition and cell elongation in dark-grown hypocotyl cells in *Arabidopsis*. *Plant Physiology* **135**, 959–968.
- Rennie EA, Scheller HV.** 2014. Xylan biosynthesis. *Current Opinion in Biotechnology* **26**, 100–107.
- Rounds CM, Lubeck E, Hepler PK, Winship LJ.** 2011. Propidium iodide competes with Ca(2+) to label pectin in pollen tubes and *Arabidopsis* root hairs. *Plant Physiology* **157**, 175–187.
- Samuels AL, Giddings TH, Jr., Staehelin LA.** 1995. Cytokinesis in tobacco BY-2 and root tip cells: a new model of cell plate formation in higher plants. *Journal of Cell Biology* **130**, 1345–1357.
- Schultink A, Naylor D, Dama M, Pauly M.** 2015. The role of the plant-specific ALTERED XYLOGLUCAN9 protein in *Arabidopsis* cell wall polysaccharide O-acetylation. *Plant Physiology* **167**, 1271–1283.
- Senechal F, Graff L, Surcouf O, et al.** 2014a. *Arabidopsis* PECTIN METHYLESTERASE17 is co-expressed with and processed by SBT3.5, a subtilisin-like serine protease. *Annals of Botany* **114**, 1161–1175.
- Senechal F, Wattier C, Rusterucci C, Pelloux J.** 2014b. Homogalacturonan-modifying enzymes: structure, expression, and roles in plants. *Journal of Experimental Botany* **65**, 5125–5160.
- Somerville C, Bauer S, Brininstool G, et al.** 2004. Toward a systems approach to understanding plant cell walls. *Science* **306**, 2206–2211.
- Sousa AG, Ahl LI, Pedersen HL, Fangel JU, Sorensen SO, Willats WG.** 2015. A multivariate approach for high throughput pectin profiling by combining glycan microarrays with monoclonal antibodies. *Carbohydrate Research* **409**, 41–47.
- Staehelin LA, Giddings TH, Jr., Kiss JZ, Sack FD.** 1990. Macromolecular differentiation of Golgi stacks in root tips of *Arabidopsis* and *Nicotiana* seedlings as visualized in high pressure frozen and freeze-substituted samples. *Protoplasma* **157**, 75–91.
- Sterling JD, Atmodjo MA, Inwood SE, Kumar Kolli VS, Quigley HF, Hahn MG, Mohnen D.** 2006. Functional identification of an *Arabidopsis* pectin biosynthetic homogalacturonan galacturonosyltransferase. *Proceedings of the National Academy of Sciences, USA* **103**, 5236–5241.
- Sterling JD, Quigley HF, Orellana A, Mohnen D.** 2001. The catalytic site of the pectin biosynthetic enzyme alpha-1,4-galacturonosyltransferase is located in the lumen of the Golgi. *Plant Physiology* **127**, 360–371.
- Tan L, Eberhard S, Pattathil S, et al.** 2013. An *Arabidopsis* cell wall proteoglycan consists of pectin and arabinoxylan covalently linked to an arabinogalactan protein. *Plant Cell* **25**, 270–287.
- Thompson JE, Fry SC.** 2000. Evidence for covalent linkage between xyloglucan and acidic pectins in suspension-cultured rose cells. *Planta* **211**, 275–286.
- Toyouka K, Goto Y, Asatsuma S, Koizumi M, Mitsui T, Matsuoka K.** 2009. A mobile secretory vesicle cluster involved in mass transport from the Golgi to the plant cell exterior. *Plant Cell* **21**, 1212–1229.
- Tyler L, Bragg JN, Wu J, Yang X, Tuskan GA, Vogel JP.** 2010. Annotation and comparative analysis of the glycoside hydrolase genes in *Brachypodium distachyon*. *BMC Genomics* **11**, 600.
- Vincken JP, Schols HA, Oomen RJ, McCann MC, Ulvskov P, Voragen AG, Visser RG.** 2003. If homogalacturonan were a side chain of rhamnogalacturonan I. Implications for cell wall architecture. *Plant Physiology* **132**, 1781–1789.
- Vogel J.** 2008. Unique aspects of the grass cell wall. *Current Opinion in Plant Biology* **11**, 301–307.
- Wagner TA, Kohorn BD.** 2001. Wall-associated kinases are expressed throughout plant development and are required for cell expansion. *Plant Cell* **13**, 303–318.
- Wang T, Park YB, Caporini MA, Rosay M, Zhong L, Cosgrove DJ, Hong M.** 2013. Sensitivity-enhanced solid-state NMR detection of expansin's target in plant cell walls. *Proceedings of the National Academy of Sciences, USA* **110**, 16444–16449.
- Wang T, Park YB, Cosgrove DJ, Hong M.** 2015. Cellulose-pectin spatial contacts are inherent to never-dried *Arabidopsis* primary cell walls: evidence from solid-state nuclear magnetic resonance. *Plant Physiology* **168**, 871–884.
- Wolf S, Greiner S.** 2012. Growth control by cell wall pectins. *Protoplasma* **249** Suppl 2, S169–175.
- Wolf S, van der Does D, Ladwig F, et al.** 2014. A receptor-like protein mediates the response to pectin modification by activating brassinosteroid signaling. *Proceedings of the National Academy of Sciences, USA* **111**, 15261–15266.
- Xiao C, Anderson CT.** 2013. Roles of pectin in biomass yield and processing for biofuels. *Frontiers in Plant Science* **4**, 67.
- Xiao C, Somerville C, Anderson CT.** 2014. POLYGALACTURONASE INVOLVED IN EXPANSION1 Functions in cell elongation and flower development in *Arabidopsis*. *Plant Cell* **26**, 1018–1035.
- Yapo BM, Lerouge P, Thibault JF, Ralet MC.** 2007. Pectins from citrus peel cell walls contain homogalacturonans homogenous with respect to molar mass, rhamnogalacturonan I and rhamnogalacturonan II. *Carbohydrate Polymers* **69**, 426–435.
- Young RE, McFarlane HE, Hahn MG, Western TL, Haughn GW, Samuels AL.** 2008. Analysis of the Golgi apparatus in *Arabidopsis* seed coat cells during polarized secretion of pectin-rich mucilage. *Plant Cell* **20**, 1623–1638.
- Zablackis E, Huang J, Muller B, Darvill AG, Albersheim P.** 1995. Characterization of the cell-wall polysaccharides of *Arabidopsis thaliana* leaves. *Plant Physiology* **107**, 1129–1138.
- Zhang GF, Staehelin LA.** 1992. Functional compartmentation of the Golgi apparatus of plant cells: immunocytochemical analysis of high-pressure frozen- and freeze-substituted sycamore maple suspension culture cells. *Plant Physiology* **99**, 1070–1083.
- Zhu C, Ganguly A, Baskin TI, McClosky DD, Anderson CT, Foster C, Meunier KA, Okamoto R, Berg H, Dixit R.** 2015. The Fragile Fiber1 kinesin contributes to cortical microtubule-mediated trafficking of cell wall components. *Plant Physiology* **167**, 780–792.
